# Supplementary material for: Integrin-Specific Mechanoresponses to Compression and Extension Probed by Cylindrical Flat-Ended AFM Tips in Lung Cells
Source: PubMed Central journal article supplement (PMC3285695; doi:10.1371/journal.pone.0032261), 2012-02-23
Supplement: pone.0032261.s002.pdf [file pone.0032261.s002.pdf]

**FIGURE S1**

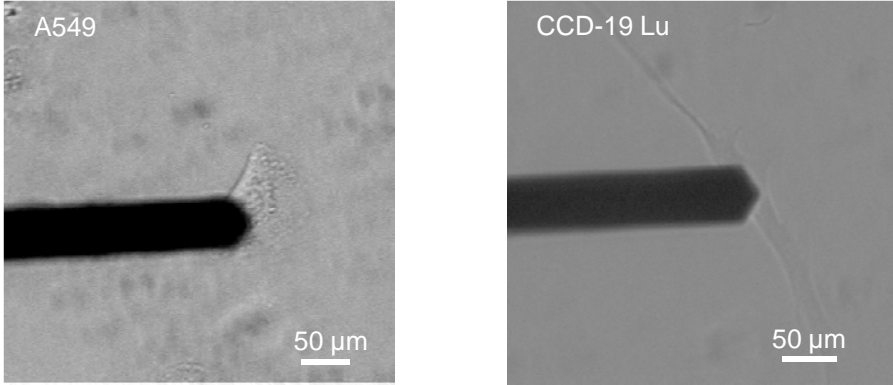

FIGURE S1. Illustrative bright field images of a FE-AFM tip in contact with the perinuclear region of an A549 cell or a CCD-19Lu fibroblast.
