# Supplementary material for: Integrin-Specific Mechanoresponses to Compression and Extension Probed by Cylindrical Flat-Ended AFM Tips in Lung Cells
Source: PubMed Central journal article supplement (PMC3285695; doi:10.1371/journal.pone.0032261), 2012-02-23
Supplement: pone.0032261.s003.pdf [file pone.0032261.s003.pdf]

FIGURE S2

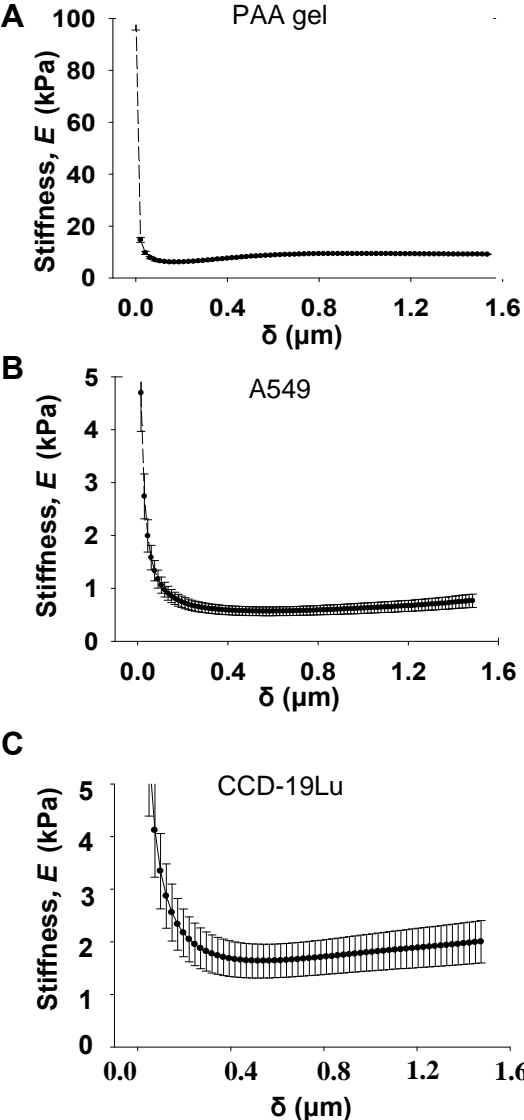

FIGURE S2. Linearity of the Young's modulus ( $E$ ) in compression in the indentation range used in the 4-step protocol. Plot of  $E$  vs indentation ( $\delta$ ) in (A) polyacrylamide gel, (B) A549 cells, and (C) CCD-19Lu fibroblast.  $E$  value reach a pleateau after the initial contact point for  $\delta > 0.2 \mu\text{m}$  in gel samples, and  $\delta > 0.4 \mu\text{m}$  in both cell types, therefore including the  $\delta$  range used to assess  $E_C$ .
