# Supplementary material for: Integrin-Specific Mechanoresponses to Compression and Extension Probed by Cylindrical Flat-Ended AFM Tips in Lung Cells
Source: PubMed Central journal article supplement (PMC3285695; doi:10.1371/journal.pone.0032261), 2012-02-23
Supplement: pone.0032261.s004.pdf [file pone.0032261.s004.pdf]

**FIGURE S3**

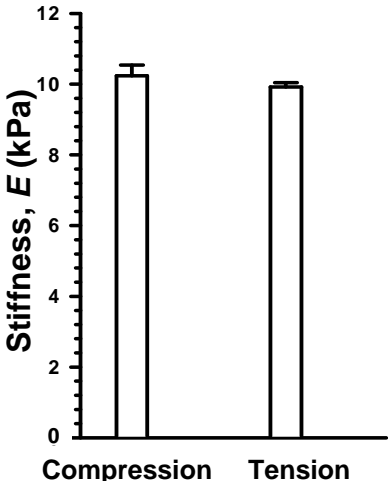

FIGURE S3.  $E$  of PAA gels probed with RGD-coated FE-AFM tips in compression and tension.  $E$  data were not statistically significantly different as shown by a paired Student's t-test.
