# Supplementary material for: Integrin-Specific Mechanoresponses to Compression and Extension Probed by Cylindrical Flat-Ended AFM Tips in Lung Cells
Source: PubMed Central journal article supplement (PMC3285695; doi:10.1371/journal.pone.0032261), 2012-02-23
Supplement: pone.0032261.s005.pdf [file pone.0032261.s005.pdf]

FIGURE S4

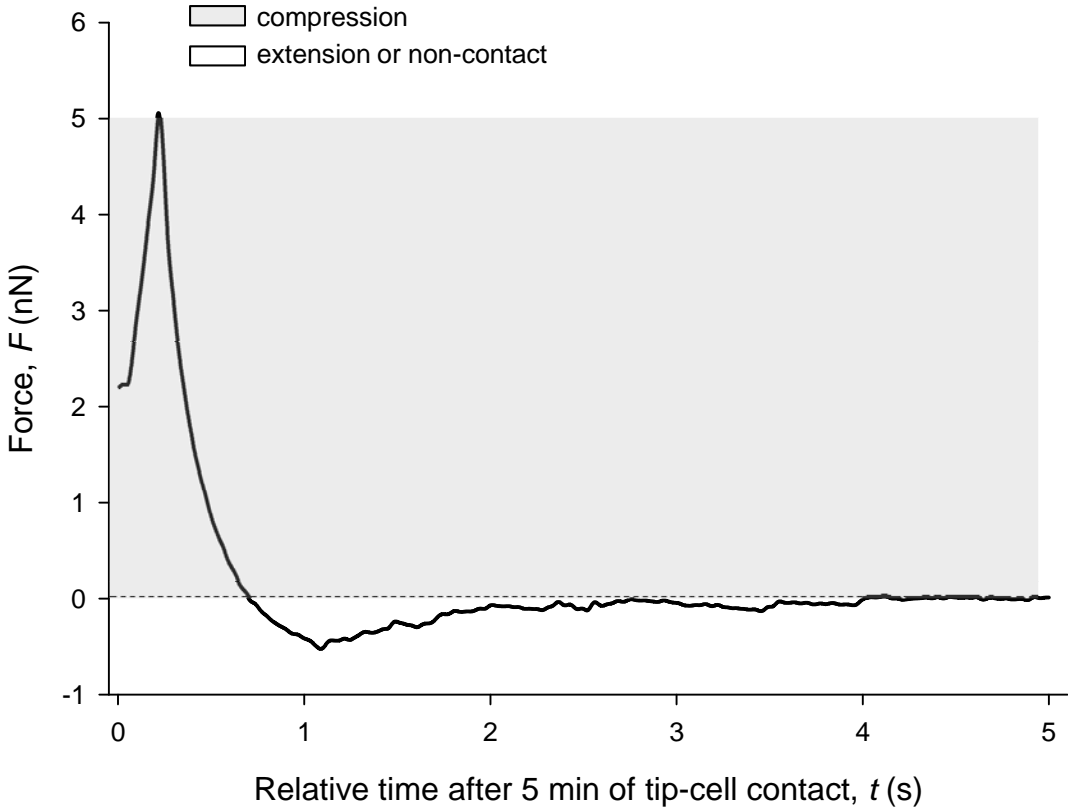

FIGURE S4. Illustrative example of force  $F$  versus time ( $t$ ) recorded on a CCD19-Lu fibroblast after holding an RGD-coated FE-AFM tip in contact with the cell for 5 min using a force control protocol.
