# Supplementary material for: Integrin-Specific Mechanoresponses to Compression and Extension Probed by Cylindrical Flat-Ended AFM Tips in Lung Cells
Source: PubMed Central journal article supplement (PMC3285695; doi:10.1371/journal.pone.0032261), 2012-02-23
Supplement: pone.0032261.s006.pdf [file pone.0032261.s006.pdf]

**FIGURE S5**

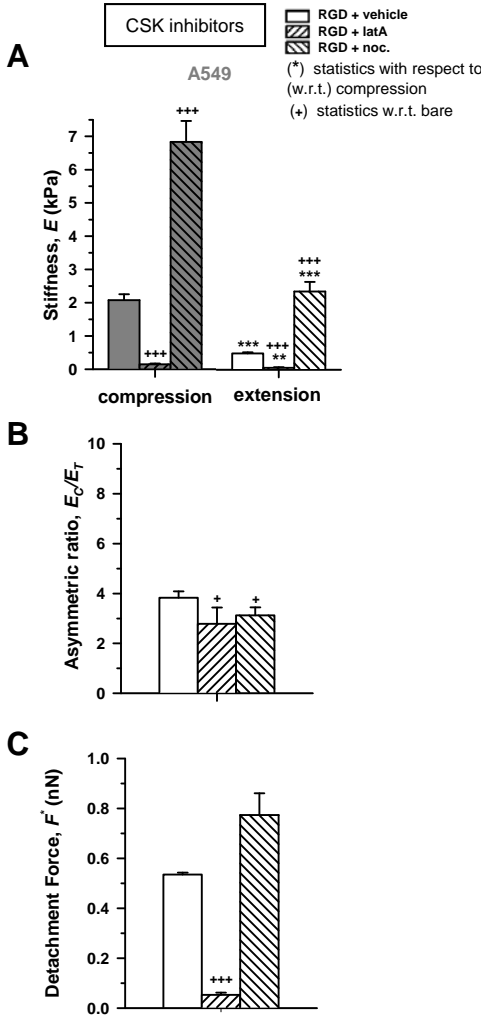

FIGURE S5. Role of the CSK integrity in RGD-induced stiffening and adhesion strengthening in A549 cells probed with RGD-coated FE-AFM tips. Effect of inhibitors against actin (latA) or microtubule (noc.) polymerization on (A) cell resistance to compression ( $E_C$ ) and tension ( $E_T$ ), (B)  $E_C/E_T$  and (C) cell-tip detachment force ( $F^*$ ).
