# Supplementary material for: Integrin-Specific Mechanoresponses to Compression and Extension Probed by Cylindrical Flat-Ended AFM Tips in Lung Cells
Source: PubMed Central journal article supplement (PMC3285695; doi:10.1371/journal.pone.0032261), 2012-02-23
Supplement: pone.0032261.s007.pdf [file pone.0032261.s007.pdf]

**FIGURE S6**

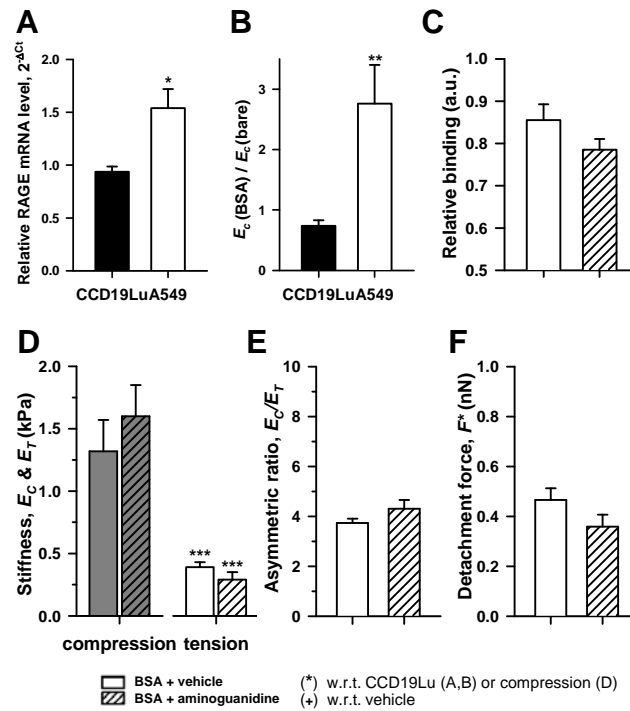

FIGURE S6. Mechanoresponses of A549 cells to BSA-coated FE-AFM tips. (A) Relative expression of RAGE in A549 cells and CCD-19Lu fibroblasts assessed by qRT-PCR as described in Suppl. Materials. (B) Normalized  $E_c$  data probed with BSA-coated tips with respect to bare tips in both cell types. (C) Relative binding of A549 cells to a BSA-coated substrata in the presence of the AGE inhibitor aminoguanidine (AMG) or vehicle, assessed as described in Suppl. Materials. Effect of AMG on (D)  $E_c$  and  $E_T$ , (E)  $E_c/E_T$  and (F)  $F^*$ . \* $P < 0.05$ , \*\* $P < 0.01$  and \*\*\* $P < 0.005$  were determined by paired Student's  $t$ -test w.r.t. compression. + $P < 0.05$ , ++ $P < 0.01$  and +++ $P < 0.005$  were determined by unpaired Student's  $t$ -test w.r.t. vehicle.
